# Supplementary material for: No evidence for alteration in early secondary mineralization by either alendronate, teriparatide or combination of both in transiliac bone biopsy samples from postmenopausal osteoporotic patients
Source: PubMed Central journal article supplement — Bone Rep. 2020 Feb 27;12:100253. doi: 10.1016/j.bonr.2020.100253 (PMC7090359; doi:10.1016/j.bonr.2020.100253), 2020-02-27
Supplement: mmc2.pdf [file mmc2.pdf]

## **Multiple files are bound together in this PDF Package.**

Adobe recommends using Adobe Reader or Adobe Acrobat version 8 or later to work with documents contained within a PDF Package. By updating to the latest version, you'll enjoy the following benefits:

- Efficient, integrated PDF viewing
- Easy printing
- Quick searches

**Don't have the latest version of Adobe Reader?**

**[Click here to download the latest version of Adobe Reader](#)**

**If you already have Adobe Reader 8,  
click a file in this PDF Package to view it.**
